# Supplementary material for: Quantitative proteomics reveals the antifungal effect of canthin-6-one isolated from Ailanthus altissima against Fusarium oxysporum f. sp. cucumerinum in vitro
Source: PLoS One. 2021 Apr 23;16(4):e0250712. doi: 10.1371/journal.pone.0250712 (PMC8064541; doi:10.1371/journal.pone.0250712)
Supplement: S3 Table — (XLSX) [file pone.0250712.s007.xlsx]

## Sheet: Sheet1
			Label free		PRM
Uniprot accession	Description	Regulated Type	Ratio(S/CK)	Pvalue(S/CK)	Ratio(S/CK)	Pvalue(S/CK)
N4UV83	Dicarboxylic amino acid permease	Down	0.162133	0.0254931	0.267	0.000740421
X0MEI5	Glutamine synthetase	Down	0.289836	0.0071316	0.665	0.00226657
N1RPA5	NAD-specific glutamate dehydrogenase	Down	0.407205	2.59313e-05	0.862	0.41673
A0A420RZZ6	Glutamine synthetase	Down	0.547968	0.000321456	0.908	0.4555
X0LQZ1	Protein transporter Sec61 subunit gamma	Down	0.553064	0.000799452	0.742	0.0119762
Q96V48	Histone H3	Down	0.590411	0.0205622	0.833	0.432333
X0M7N8	Glutamate synthase [NADPH]	Down	0.62164	0.0129442	0.736	0.0940702
X0LS29	Eukaryotic translation initiation factor 3 subunit D (eIF3d)	Up	1.5156	0.000467833	2.846	0.000837866
X0M126	Acetolactate synthase	Up	1.5328	0.00929961	2.921	0.0019122
X0LF43	Glutamyl-tRNA synthetase	Up	1.54226	0.00012106	2.365	0.00104665
X0BXH3	Histone chaperone	Up	1.64785	0.00118832	2.201	0.0141237
A0A0D2XC47	Aspartokinase	Up	1.65957	0.0480999	3.053	0.00295088
X0NMZ6	60S ribosomal protein L27-A	Up	1.68828	0.0100943	2.103	0.000251666
X0NKJ9	Homoserine kinase	Up	1.69741	5.09163e-05	2.482	0.00290199
X0MMT6	Nitrite reductase [NAD(P)H]	Up	1.71828	0.0104322	11.032	0.000496636
X0MCR2	40S ribosomal protein S29	Up	1.7317	0.000991122	2.605	0.0028913
X0MA59	Aspartate-semialdehyde dehydrogenase	Up	2.0923	0.000357131	1.817	0.176601
A0A420Q5S4	Aspartate aminotransferase	Up	2.14988	0.00010352	4.715	0.00297264
